# Supplementary material for: H3.3-H4 Tetramer Splitting Events Feature Cell-Type Specific Enhancers
Source: PubMed Central journal article supplement (PMC3675017; doi:10.1371/journal.pgen.1003558), 2013-06-06
Supplement: pgen.1003558.s002.pdf [file pgen.1003558.s002.pdf]

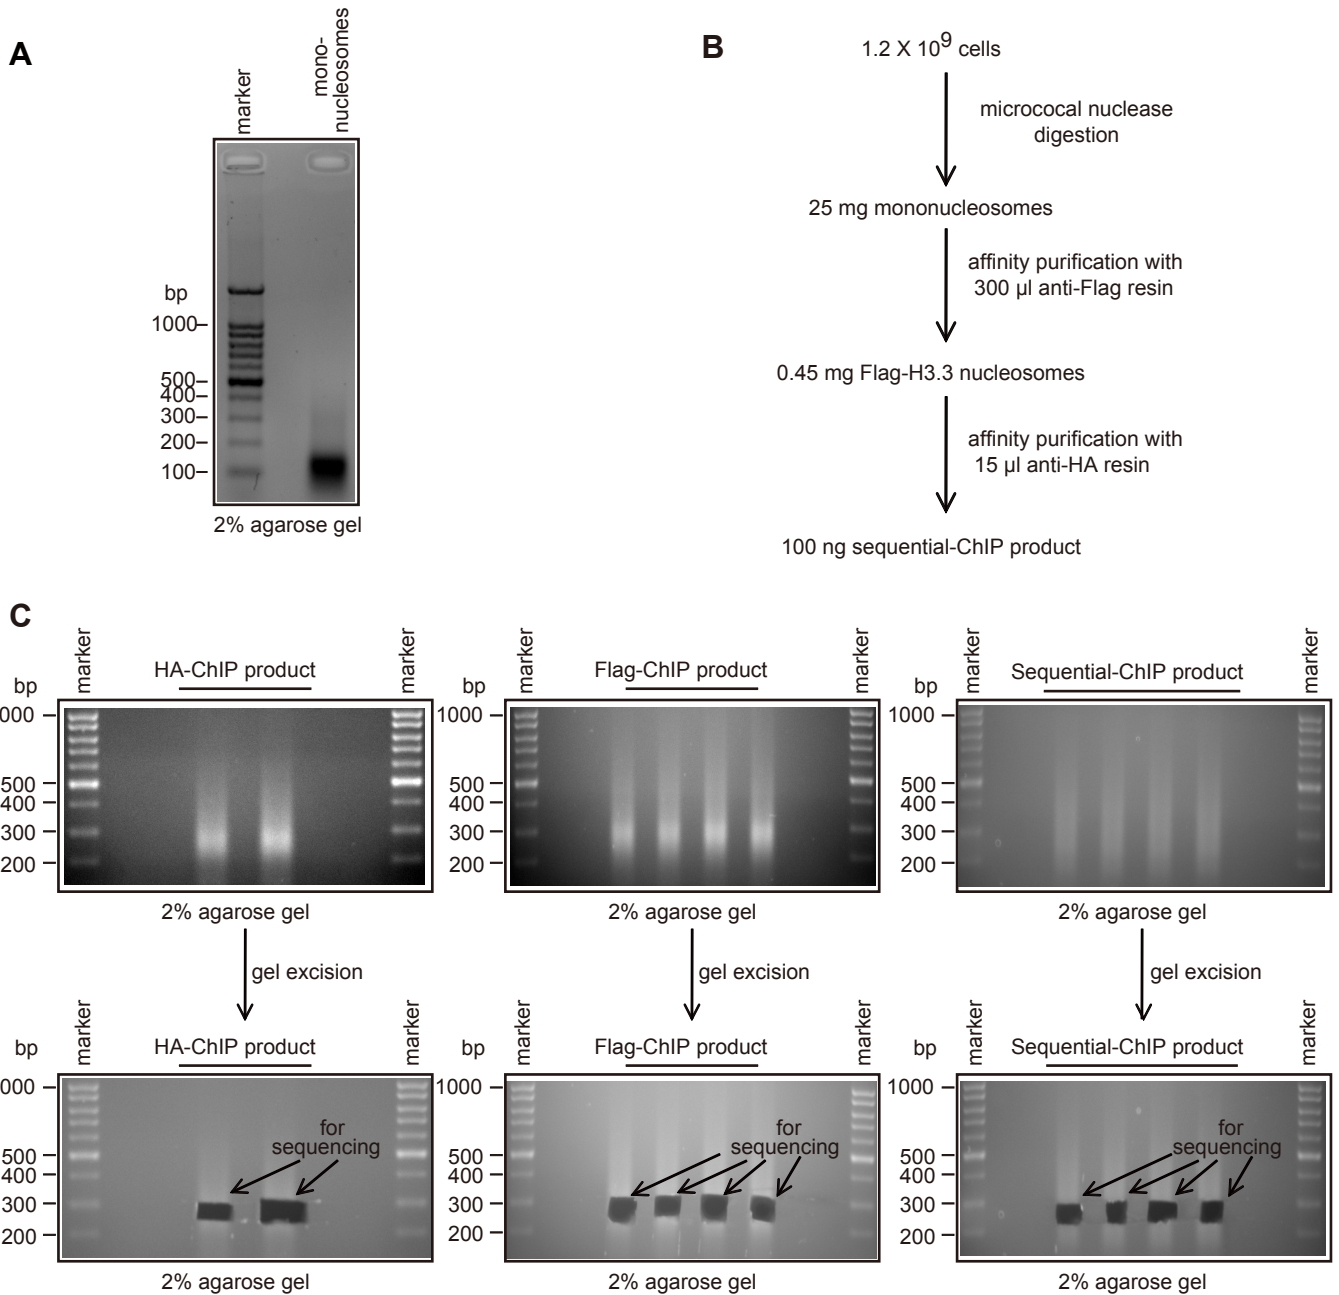

**D**

|         | sample                   | reads#      | uniquely mapped | %     |
|---------|--------------------------|-------------|-----------------|-------|
| Fig. 1B | HeLa mononucleosome      | 34,515,426  | 27,911,860      | 80.87 |
|         | Flag-H3.3 single         | 56,049,533  | 44,215,584      | 78.89 |
|         | HA-H3.3 single           | 66,103,614  | 49,687,080      | 75.17 |
|         | Sequential-H3.3          | 69,106,522  | 45432288        | 65.74 |
| Fig. 2A | HA-H3.3 0 h              | 126,204,390 | 87,015,169      | 68.95 |
|         | HA-H3.3 24 h             | 133,385,975 | 86,623,446      | 64.94 |
|         | HA-H3.3 48 h             | 168,648,856 | 114,834,109     | 68.09 |
| Fig. 7D | co-expressed Flag-H3.3   | 140,021,966 | 96,200,122      | 68.70 |
|         | co-expressed HA-H3.3     | 142,889,495 | 87,124,158      | 60.97 |
|         | co-expressed Double-H3.3 | 143,515,150 | 57,284,102      | 39.92 |
