# Supplementary material for: H3.3-H4 Tetramer Splitting Events Feature Cell-Type Specific Enhancers
Source: PubMed Central journal article supplement (PMC3675017; doi:10.1371/journal.pgen.1003558), 2013-06-06

Huang\_Figure S4

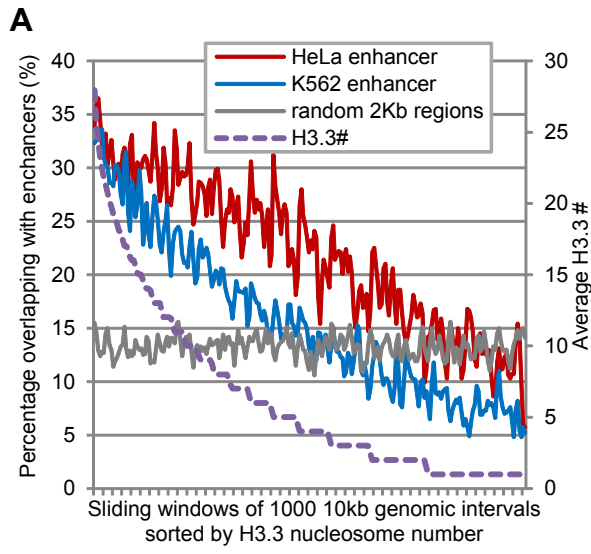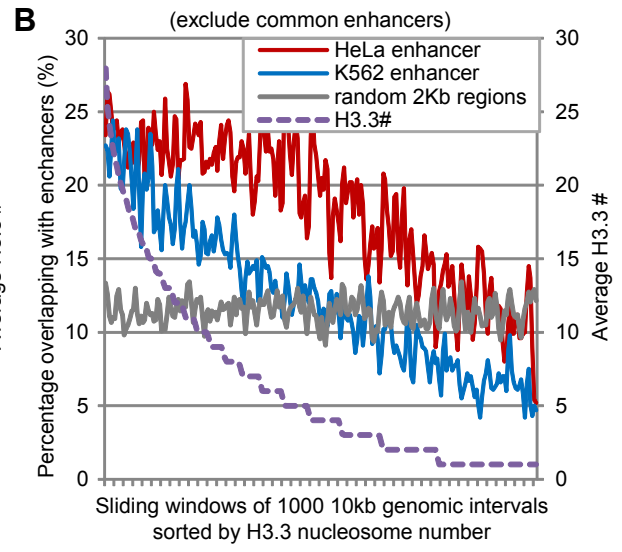

Supplement: pgen.1003558.s004.pdf [file pgen.1003558.s004.pdf]
